# Keeping Patients Safe: Patient Safety Content for the ASA Community and Beyond

Letitia Jane Easdown, M.D., M.H.P.E.

**The Anesthesia Patient Safety Editorial Board (APSEB) was created in 2007 to provide patient safety education content** so members could comply with the 20 CME hours required by the ABA to satisfy MOCA requirements. The Anesthesia Patient Safety Editorial Board (APSEB) was created in 2007 to provide patient safety education content so members could comply with the 20 CME hours required by the ABA to satisfy MOCA requirements. The ABA then addressed the need for more personalized and meaningful lifelong learning by instituting MOCA 2.0 in 2015. APSEB has continued to provide the best patient safety educational activities – live and online – to keep up with the expectation for safe anesthesiology. There are currently 66 hours of online, interventional, high-quality patient safety material available on the ASA website found under “Education and Career > Education Center: <https://education.asahq.org/totara>. Many of these resources are complimentary to members and 19 modules are free to ASA member students.

## Patient Safety Content in 2020

ASA patient safety content is available for Part 2 MOCA. The most popular module is the Fundamentals of Patient Safety, a 10-hour self-paced module based on five topic areas – epidemiology of errors, safety culture, systems approach, communications and error analysis and prevention. This has been translated into Spanish and available to our colleagues throughout Latin America. We also see considerable interest in the Patient Safety Highlights from the ASA annual meeting, a collection of review courses, panels and debates presented at the meeting. Other modules for specific patient safety issues such as infection control or difficult airway management are

available. In 2019, the APSEB became the editorial board supporting the group who creates A-ACLS material. New modules are being added continually so it is important to review the website often.

## Growing Audience for Patient Safety Content

Although the material was originally targeted for ASA physician anesthesiologists, we now see this content in use for continuing professional development in other groups – physicians from other specialties, anesthesiologist assistants, CRNAs and trainees. Our trainees are anesthesiology residents and fellows as well as student anesthesiologist assistants and student CRNAs. APSEB keeps abreast of all developments in CME and MOCA to better serve the ASA community. In addition, the membership and composition of the ASA has grown more diverse with more international members attending the live meetings and also interacting with the ASA Education Center. The interest in our patient safety material has moved beyond the anesthesiology community with our modules accepted for CME or MOC in other U.S. boards such as thoracic surgery and ophthalmology. The ASA content in patient safety has also been endorsed by the National Patient Safety Foundation /IHI.

“There are currently 66 hours of online, interventional, high-quality patient safety material available on the ASA website.”

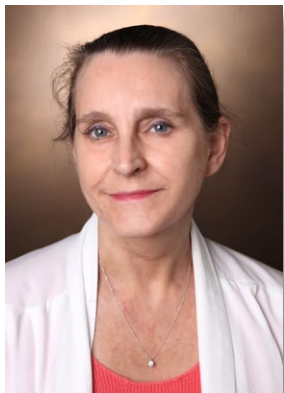

*Letitia Jane Easdown, M.D., M.H.P.E., is Associate Professor of Anesthesiology, Vanderbilt University Medical Center, Nashville.*

## What APSEB Does

The APSEB editors work throughout the year to create and edit patient safety material for the ASA membership. In advance of every ASA meeting, the objectives of every session are assessed for patient safety content. Criteria for acceptance for PS-MOCA are systems-level patient safety content such as discussions of checklists, human factors, crisis resource management or culture of safety. Patient Safety MOCA Part 2 credit is given to those members who attend these live sessions. Over 6,000 Patient safety MOCA Part 2 credit was claimed by 1,200 attendees at ANESTHESIOLOGY 2019. The editors also attend these sessions to determine if they qualify as enduring

materials, and every year these sessions become the “Patient Safety Highlights” of that ASA meeting. According to our membership needs assessment, new material is authored by APSEB editors. It should be noted that the APSEB editors are also active within other patient safety groups such as the Anesthesia Patient Safety Foundation, International Forum for Perioperative Patient Safety and Quality and Anesthesia Quality Institute/AIRS.

The editorial board in 2020 consists of:

- Alexander Arriaga, M.D. (Brigham & Women’s)
- Jane Easdown, M.D. , M.H.P.E., (Vanderbilt) Editor-in-Chief
- Jeffrey Green, M.D. (Virginia Commonwealth)
- Deborah Schwengel, M.D. , M.E.H.P. (Johns Hopkins)
- Michael Loushin, M.D. (Twin Cities Anesthesia Associates, Minnesota)
- Keith Ruskin, M.D. (University of Chicago)
- Scott Watkins, M.D. (Johns Hopkins All Children’s, Tampa)

In 2019, our two remaining original members and past editors in chief, Butch Uejima and David Martin, rotated off due to term limits. We are indebted to them for their service to

APSEB and how they shaped this highly effective committee and its many ongoing projects. Members of the APSEB are nominated and selected based on expertise in education and patient safety as well as diversity in clinical practice. Representatives to APSEB who assist in planning and assessing education content for CME compliance are Michael Stout (AAAA), and Michael Leersnyder and Jason Anderson (AANA). The APSEB is supported by the expertise of Gerry Higgins, ASA Senior Learning Technology and Production Manager, and Bonita Hayes, ASA e-Learning Instructional Designer. We could not succeed without their expertise and ongoing support.

### New Endeavors

APSEB is working on new modules for pediatric content in association with the Society for Pediatric Anesthesia. Look out for a new *ASA Monitor* item “Safety tip of the month” starting in June 2020. We encourage your feedback on modules and your suggestions for future patient safety material we could develop for your needs. We endeavor to provide the most up-to-date patient safety content for ASA members to monitor their knowledge and skills and keep patients safe.

Downloaded from <http://asa2.silverchair.com/monitor/article-pdf/45931/34.pdf> by guest on 19 April 2024

# FASA

## Be recognized as an anesthesia physician leader!

Apply for the Fellow of the American Society of Anesthesiologists® (FASA®) designation and demonstrate your influence in areas of professionalism, leadership, advocacy, education and scholarly activities.

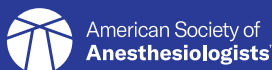

American Society of  
**Anesthesiologists**™

Stand out from the crowd  
[asahq.org/fasa](http://asahq.org/fasa)

19-089
